# Supplementary material
Source: publisher figshare collection journal article supplement (https://karger.figshare.com/ndownloader/files/28451025)
Supplement: Supplementary file 1 [file 28451025]

**Supplemental Table.** The list of the generic names of frailty-related drugs.

|  | **Generic name** |
| --- | --- |
|  | ALPRAZOLAM |
|  | AMITRIPTYLINE HCL |
|  | CIMETIDINE |
|  | CLONAZEPAM |
|  | CYCLOBENZAPRINE HCL |
|  | CYPROHEPTADINE HCL |
|  | DIAZEPAM |
|  | DIPHENHYDRAMINE HCL |
|  | DIPHENOXYLATE HCL/ATROPINE |
|  | DOXEPIN HCL |
|  | ESZOPICLONE |
|  | FAMOTIDINE |
|  | HYDROXYZINE HCL |
|  | HYDROXYZINE PAMOATE |
|  | LORAZEPAM |
|  | MECLIZINE HCL |
|  | NORTRIPTYLINE HCL |
|  | OLANZAPINE |
|  | ORPHENADRINE CITRATE |
|  | OXYBUTYNIN CHLORIDE |
|  | PAROXETINE HCL |
|  | PERPHENAZINE |
|  | PROCHLORPERAZINE MALEATE |
|  | PROMETHAZINE HCL |
|  | RANITIDINE HCL |
|  | TIOTROPIUM BROMIDE |
|  | TOLTERODINE TARTRATE |
|  | TRIHEXYPHENIDYL HCL |
|  | ZOLPIDEM TARTRATE |
